# Supplementary material for: A prospective cohort study of dietary intake and clinical-nutritional biomarkers in patients with periampullary malignancies undergoing pancreatoduodenectomy undergoing pancreatoduodenectomy in Southeast Brazil
Source: Research Square preprint supplement (doi:10.21203/rs.3.rs-7820804/v1), 2025-11-26
Supplement: Supplementary file 1 [file da6458f98658d91af780270c.docx]

| **Table 1**. Demographic characteristics, histopathological diagnoses, and TNM staging of patients undergoing pancreaticoduodenectomy (PD) and controls. | | |
| --- | --- | --- |
| **Variable** | **PD Group (n=24)** | **Control Group (n=20)** |
| Age (years) | 62,9 ± 11,9 | 61,8 ± 12,5 |
| Male sex | 15 (62,5%) | 12 (60%) |
| Famale sex | 9 (37,5%) | 8 (40%) |
|  | | |
| **Histopathological diagnosis of the PD Group** | | **(n,%)** |
| Pancreatic head adenocarcinoma | | 11 (45,8%) |
| Ampullary adenocarcinoma | | 8 (33,3%) |
| Uncinate process adenocarcinoma | | 2 (8,3%) |
| Pancreatic ductal adenocarcinoma | | 1 (4,2%) |
| Biliary carcinoma | | 2 (8,3%) |
|  | | |
| TNM classification of the PD Group | | **(n,%)** |
| CN1 M0 G2 | | 1 (6,20) |
| pT1 N0 M0 | | 1 (6,20) |
| pT1 PNI1 M0 | | 1 (6,20) |
| pT1C N0 M0 | | 1 (6,20) |
| pT2 N0 M0 | | 3 (18,80) |
| pT2 N2 M0 | | 2 (12,50) |
| pT2 N1 M0 | | 2 (12,50) |
| pT3 N1 M0 | | 1 (6,20) |
| pT3B N0 M0 | | 1 (6,20) |
| pT3B N1 M0 | | 1 (6,20) |
| pT4 N0 M0 | | 1 (6,20) |
| TNM: Tumor staging system of the Union for International Cancer Control (UICC) and the American Joint Committee on Cancer (AJCC), 8th edition (2017) [34], based on the extent of the primary tumor (T), lymph node involvement (N), and presence of distant metastases (M**).** | | |

| **Table 2.** Summary measures of dietary intake variables in PD patients at baseline, 3 months, and 6 months after hospital discharge. | | | | | | |
| --- | --- | --- | --- | --- | --- | --- |
|  | **Preoperative (n=24)** | | **3 months after discharge (n=18)** | | **PD – 6 months after discharge (n=16)** | |
| **Mean ± SD or Median (P25–P75)** | ***p1*** | **Mean ± SD or**  **Median (P25–P75)** | ***p2*** | **Mean ± SD or Median (P25–P75)** | ***p3*** |
| Energy (kcal) | 3511.64  (2586.19–4380.52) | z = 6.080;  p = 0.000 | 1730.12  (1338.49–2359.43) | z = - 0.320;  p = 0.945 | 1650.53  (1412.58–2283.87) | z = 6.426;  p = 0.000 |
| Carbohydrate (g) | 491.90  (364.31–582.55) | z = 6.545;  p = 0.000 | 276.81  (208.92–305.89) | z = - 0.954;  p = 0.606 | 287.95  (235.57–335.08) | z = 7.501;  p = 0.000 |
| Lipid (g) | 101.17  (79.19–127.72) | z = 5.381;  p = 0.000 | 50.79  (40.26–67.01) | z = 0.199;  p = 0.978 | 44.15  (40.12–70.76) | z = 5.188;  p = 0.000 |
| Protein (g) | 142.28  (114.92–215.60) | z = 6.399;  p = 0.000 | 92.44  (71.28–102.57) | z = 0.191;  p = 0.980 | 84.26  (65.27–115.16) | z = 6.230;  p = 0.000 |
| Fiber (g) | 57.23  (45.48–73.02) | z = 6.510;  p = 0.000 | 33.17  (29.95–42.07) | z = - 0.168;  p = 0.985 | 34.89  (27.88–44.66) | z = 6.675;  p = 0.000 |
| Calcium (mg) | 1831.68 ± 490.50 | t(46) = 5.921; p = 0.000 | 1249.66 ± 464.36 | t(46) = 0.288; p = 0.955 | 1219.86 ± 441.27 | t(46) = 5.632; p = 0.000 |
| Iron (mg) | 33.34  (27.75–44.23) | z = 4.942;  p = 0.000 | 21.35  (15.86–25.65) | z = -0.038;  p = 0.999 | 22.01  (16.75–24.20) | z = 4.959;  p = 0.000 |
| Potassium (mg) | 8486.07  (6541.50–10213.13) | z = 5.406;  p = 0.000 | 5339.72  (4495.65–6299.40) | z = 0.485;  p = 0.878 | 5194.51  (4453.46–6060.92) | z = 4.938;  p = 0.000 |
| Selenium (µg) | 74.04 ± 34.12 | t(46) = 5.062; p = 0.000 | 46.04 ± 21.55 | t(46) = 0.357; p = 0.932 | 43.92 ± 20.31 | t(46) = 4.705; p = 0.000 |
| Zinc (mg) | 21.82  (16.48–27.97) | z = 5.294;  p = 0.000 | 12.76  (10.10–15.11) | z = - 0.729;  p = 0.746 | 13.46  (10.42–15.91) | z = 6.036;  p = 0.000 |
| Sodium (mg) | 1990.23  (1606.37–2825.68) | z = 6.765;  p = 0.000 | 1394.30  (928.46–1671.63) | z = 1.285;  p = 0.403 | 1136.58  (758.85–1540.41) | z = 5.491;  p = 0.000 |
| Vitamin A (mg) | 5.71  (3.91–10.41) | z = 3.221;  p = 0.007 | 4.13  (3.25–6.72) | z = - 0.212;  p = 0.976 | 4.26  (3.03–6.70) | z = 3.446;  p = 0.005 |
| Vitamin C (mg) | 412.88  (255.65–696.35) | z = 4.239;  p = 0.000 | 321.84  (230.29–431.98) | z = 1.133;  p = 0.493 | 243.90  (196.64–426.20) | z = 3.102;  p = 0.011 |
| Vitamin E (mg) | 6.38  (3.25–7.66) | z = 4.806;  p = 0.000 | 3.50  (2.97–5.19) | z = 0.194;  p = 0.980 | 3.71  (2.79–5.33) | z = 4.641;  p = 0.000 |
| kcal: kilocalories; g: grams; mg: milligrams; mcg: micrograms. Data are presented as mean ± standard deviation (SD) or as median (P25–P75), according to the statistical distribution observed at each time point. p-values refer to the statistical models applied for comparisons between time points: p¹ = preoperative vs. 3 months; p² = 3 months vs. 6 months; p³ = preoperative vs. 6 months. Linear mixed models (t-test, with degrees of freedom estimated by the Satterthwaite method) were used for variables with approximately normal distribution, and generalized linear models (z-statistic) for variables with non-normal distribution, according to the adequacy of each variable. Holm–Bonferroni correction was applied for multiple comparisons. p-values ≤ 0.05 were considered statistically significant. | | | | | | |

| **Tabela 3.**  Summary measures of dietary intake variables comparing the Control Group and PD patients at baseline, 3 months, and 6 months after hospital discharge. | | | | | | | | | |
| --- | --- | --- | --- | --- | --- | --- | --- | --- | --- |
|  | **Control Group**  **(n=20)** | | **Preoperative**  **(n=24)** | | | **3 months after discharge (n=18)** | | **PD – 6 months after discharge**  **(n=16)** | |
| **Média ± DP** | **Mediana**  **(P25-P75%)** | **Mean ± SD or Median (P25–P75)** | ***p1*** | **Mean ± SD or Median (P25–P75)** | | ***p2*** | **Mean ± SD or Median (P25–P75)** | ***p3*** |
| Energy (kcal) | 2731.14 ± 549.94 | 2591.00  (2296.50–3083.14) | 3444.23 ± 1130.73 | t(34.5) = 2.727;  p = 0.010 | 1730.12  (1338.49–2359.43) | | U = 105;  p = 0.002 | 1650.53  (1412.58–2283.87) | U = 108;  p = 0.002 |
| Carbohydrate (g) | 347.36 ± 75.09 | 334.73  (289.48–390.41) | 481.90 ± 166.04 | t(33.3) = 3.557;  p = 0.001 | 276.81  (208.92–305.89) | | U = 124;  p = 0.006 | 287.95  (235.57–335.08) | U = 150;  p = 0.035 |
| Lipid (g) | 84.27 ± 25.76 | 81.70  (67.36–100.41) | 105.38 ± 45.81 | t(37.3) = 1.922;  p = 0.062 | 50.79  (40.26–67.01) | | U = 113;  p = 0.003 | 44.15  (40.12–70.76) | U = 109;  p = 0.002 |
| Protein (g) | 134.85 ± 43.32 | 138.20  (100.65–157.95) | 159.55 ± 62.06 | t(42) = 1.500;  p = 0.141 | 92.44  (71.28–102.57) | | U = 110;  p = 0.002 | 84.26  (65.27–115.16) | U = 99;  p = 0.001 |
| Fiber (g) | 28.65 ± 9.90 | 25.80  (22.58–32.31) | 57.23  (45.48–73.02) | U = 446;  p = 0.000 | 33.17  (29.95–42.07) | | U = 337;  p = 0.023 | 34.89  (27.88–44.66) | U = 329;  p = 0.037 |
| Calcium (mg) | 742.81 ± 403.79 | 525.60  (445.52–1062.96) | 1875.57  (1509.57–2216.93) | U = 456;  p = 0.000 | 1146.75  (874.98–1569.06) | | U = 387;  p = 0.001 | 1136.41  (878.55–1579.53) | U = 384;  p = 0.001 |
| Iron (mg) | 14.65 ± 3.85 | 14.14  (12.40–17.92) | 33.98 ± 10.72 | t(29.8) = 8.228;  p = 0.000 | 21.35  (15.86–25.65) | | U = 384;  p = 0.001 | 22.01  (16.75–24.20) | U = 392;  p = 0.000 |
| Potassium (mg) | 3506.64 ± 955.95 | 3680.39  (2683.05–4257.52) | 8411.52 ± 2490.51 | t(30.7) = 8.894;  p = 0.000 | 5339.72  (4495.65–6299.40) | | U = 425;  p = 0.000 | 5194.51  (4453.46–6060.92) | U = 414;  p = 0.000 |
| Selenium (µg) | 210.71 ± 132.09 | 203.05  (67.66–331.17) | 74.04 ± 34.12 | t(21.1) = -4.503; p = 0.000 | 46.04 ± 21.55 | | t(19.8) = - 5.514;  p = 0.000 | 43.92 ± 20.31 | t(19.7) = -5.592;  p = 0.000 |
| Zinc (mg) | 13.48 ± 3.23 | 12.95  (10.78–16.33) | 22.89 ± 8.71 | t(30.2) = 4.907;  p = 0.000 | 12.76  (10.10–15.11) | | U = 228;  p = 0.786 | 13.46  (10.42–15.91) | U = 237;  p = 0.953 |
| Sodium (mg) | 1032.30 ± 437.92 | 930.65  (678.40–1362.72) | 1990.23  (1606.37–2825.68) | U = 433;  p = 0.000 | 1394.30  (928.46–1671.63) | | U = 336;  p = 0.024 | 1136.58  (758.85–1540.41) | U = 283;  p = 0.316 |
| Vitamin A (mg) | 1.54 ± 0.77 | 1.23  (0.96–1.86) | 5.71 (3.91–10.41) | U = 467;  p = 0.000 | 4.13  (3.25–6.72) | | U = 459;  p = 0.000 | 4.26  (3.03–6.70) | U = 453;  p = 0.000 |
| Vitamin C (mg) | 264.34 ± 151.57 | 307.20  (94.04–387.40) | 412.88  (255.65–696.35) | U = 345;  p = 0.014 | 321.84  (230.29–431.98) | | U = 294;  p = 0.207 | 243.90  (196.64–426.20) | U = 266;  p = 0.548 |
| Vitamin E (mg) | 12.51 ± 3.89 | 12.95  (9.30–14.05) | 6.38 (3.25–7.66) | U = 41;  p = 0.000 | 3.94 ± 1.88 | | t(26.3) = -9.011;  p = 0.000 | 3.71 (2.79–5.33) | t(26.2) = -9.124;  p = 0.000 |
| kcal: kilocalories; g: grams; mg: milligrams; mcg: micrograms. Data are presented as mean ± standard deviation (SD) or as median (P25–P75), according to the statistical distribution observed in each comparison between groups. Comparisons were performed between the Control Group and patients undergoing pancreaticoduodenectomy (PD) at the following time points: p¹ = Control vs. Preoperative; p² = Control vs. 3 months after hospital discharge; p³ = Control vs. 6 months after hospital discharge. Variables with normal distribution and homogeneity of variance were analyzed using Student’s t-test; in cases of heterogeneity of variance, Welch’s t-test was applied, with the respective degrees of freedom indicated in the table. For variables with nonparametric distribution, the Mann–Whitney U test was used. Correction for multiple comparisons was performed using the Holm–Bonferroni method. p-values ≤ 0.05 were considered statistically significant. | | | | | | | | | |

| **Table 4**. Measures of centrality and dispersion of laboratory test data in patients in the PD Group at pre-operative, 3, and 6 months after discharge. | | | | | | |
| --- | --- | --- | --- | --- | --- | --- |
|  | **Preoperative**  **(n=24)** | | **3 months after discharge (n=18)** | | **PD – 6 months after discharge**  **(n=16)** | |
| **Mean ± SD or Median (P25–P75)** | ***p1*** | **Mean ± SD or Median (P25–P75)** | **Mean ± SD or Median (P25–P75)** | ***p1*** | **Mean ± SD or Median (P25–P75)** |
| Total Proteins (g/dL) | 6.87 (6.74–7.24) | z = 0.807; p = 0.699 | 6.79 (6.44–7.03) | z = 0.122; p = 0.992 | 6.76 (6.36–7.37) | z = 0.929; p = 0.622 |
| Albumin (g/dL) | 4.04 (3.45–4.46) | z = -0.646; p = 0.795 | 4.22 (3.92–4.44) | z = 0.037; p = 0.999 | 4.19 (3.85–4.45) | z = -0.609; p = 0.815 |
| C-Reactive Protein (mg/L) | 6.19 (2.64–17.03) | z = 5.416; p = 0.000 | 0.77 (0.40–4.23) | z = 2.045; p = 0.102 | 0.40 (0.40–0.62) | z = 6.966; p = 0.000 |
| Blood Glucose (mg/dL) | 121.54 (97.36–154.50) | z = 0.088; p = 0.996 | 122.08 (84.74–140.50) | z = 1.374; p = 0.355 | 115.48 (88.98–122.20) | z = 1.457; p = 0.312 |
| Hemoglobin (g/dL) | 12.62 ± 2.25 | t(46) = 0.462; p = 0.889 | 12.42 ± 1.57 | t(46) = 0.745; p = 0.738 | 12.10 ± 2.02 | t(46) = 1.207; p = 0.455 |
| Lymphocytes (x10³/mm³) | 2233.33 ± 1241.55 | t(46) = 0.199; p = 0.978 | 2170.83 ± 1019.16 | t(46) = -0.726;  p = 0.749 | 2398.95 ± 1028.19 | t(46) = -0.527;  p = 0.858 |
| Serum Iron (µg/dL) | 87.40 ± 38.18 | t(46) = -0.709; p = 0.759 | 95.03 ± 49.70 | t(46) = 0.489;  p = 0.877 | 89.77 ± 38.00 | t(46) = -0.22;  p = 0.974 |
| Ferritin (ng/mL) | 336.00 (93.67–828.80) | z = 1.86; p = 0.015 | 254.60 (159.27–554.30) | z = 1.519; p = 0.282 | 189.60 (119.40–401.50) | z = 3.37; p = 0.002 |
| UIBC (µg/dL) | 284.25 (251.53–311.06) | z = -0.711; p = 0.757 | 296.85 (276.77–307.78) | z = -0.215; p = 0.975 | 294.35 (282.52–314.73) | z = -0.926; p = 0.624 |
| Transferrin (mg/dL) | 227.40 (201.22–248.85) | z = -0.710; p = 0.755 | 237.48 (221.42–246.22) | z = -0.211; p = 0.970 | 235.48 (226.02–251.78) | z = -0.921; p = 0.610 |
| Transferrin Saturation (%) | 31.45 ± 14.67 | t(46) = -0.17; p = 0.984 | 32.07 ± 15.61 | t(46) = 0.491; p = 0.876 | 30.29 ± 13.20 | t(46) = 0.321; p = 0.945 |
| Urea (mg/dL) | 34.72 (25.59–41.40) | z = 0.527; p = 0.858 | 31.75 (23.37–38.97) | z = -0.539; p = 0.852 | 31.25 (21.96–40.44) | z = -0.024; p = 1000 |
| Creatinine (mg/dL) | 0.92 (0.80–1.16) | z = 1.022; p = 0.563 | 0.84 (0.74–1.14) | z = -0.358; p = 0.932 | 0.87 (0.78–1.09) | z = -1.378; p = 0.352 |
| Aspartate Aminotransferase (AST) (U/L) | 147.88 (81.54–267.31) | z = 8.871; p = 0.000 | 29.61 (24.15–38.55) | z = 0.896; p = 0.643 | 27.85 (25.46–38.81) | z = 9.504; p = 0.000 |
| Alanine Aminotransferase (ALT) (U/L) | 146.68 (71.69–253.93) | z = 10.462; p = 0.000 | 29.73 (16.52–39.14) | z = -0.504; p = 0.869 | 34.09 (23.50–42.54) | z = 9.957; p = 0.000 |
| Folic Acid (ng/mL) | 13.85 (9.91–18.99) | z = -2.09; p = 0.092 | 20.67 (10.81–24.00) | z = -0.592; p = 0.825 | 21.52 (13.80–24.00) | z = -2.684; p = 0.020 |
| Vitamin B12 (pg/mL) | 478.00 (410.00–688.00) | z = -1.033; p = 0.556 | 561.50 (382.50–1047.00) | z = 2.017; p = 0.108 | 359.50  (313.00–544.50) | z = 1.001; p = 0.577 |
| Vitamin A (µg/dL) | 0.30 (0.19–0.35) | z = -1.161; p = 0.477 | 0.33 (0.27–0.40) | z = -0.217; p = 0.974 | 0.30 (0.26–0.38) | z = -1.378; p = 0.353 |
| Vitamin E (mg/dL) | 7.46 (6.11–8.60) | z = 1.949; p = 0.125 | 6.77 (5.93–9.34) | z = 2.767; p = 0.016 | 4.98 (4.88–6.13) | z = 4.723; p = 0.000 |
| Copper (µg/dL) | 139.00 (105.35–152.45) | z = 4.729; p = 0.000 | 103.00 (87.35–113.35) | z = 1.179; p = 0.466 | 93.70 (71.80–105.85) | z = 5.900; p = 0.000 |
| Zinc (µg/dL) | 87.50 (58.25–96.00) | z = -1.512; p = 0.285 | 77.00 (73.62–86.62) | z = 1.509; p = 0.287 | 80.75 (69.88–89.53) | z = -0.005; p = 1000 |
| UIBC: Unsaturated Iron-Binding Capacity; g/dL: grams per deciliter; mg/dL: milligrams per deciliter; mg/L: milligrams per liter; µg/dL: micrograms per deciliter; ng/mL: nanograms per milliliter; pg/mL: picograms per milliliter; x10³/mm³: thousand cells per cubic millimeter; U/L: units per liter; %: percentage. Data are expressed as mean ± SD or median (P25–P75%), according to the statistical distribution observed in each comparison. P-values refer to the statistical models applied for comparisons between time points: p¹ = pre-operative vs. 3 months; p² = 3 months vs. 6 months; p³ = pre-operative vs. 6 months. Mixed-effect linear models (t-test, with degrees of freedom estimated by Satterthwaite's method) were used for variables with an approximately normal distribution, and generalized linear models (z-statistic) for variables with a non-normal distribution, according to the suitability of each variable. The Holm-Bonferroni method was used for the correction of multiple comparisons. P-values ≤ 0.05 were considered statistically significant. | | | | | | |

| **Table 5.** Measures of centrality, dispersion, and comparative statistical analysis of laboratory test data from patients in the Control Group vs. those in the PD Group (pre-operative, 3 and 6 months after discharge). | | | | | | | | | | |
| --- | --- | --- | --- | --- | --- | --- | --- | --- | --- | --- |
|  | **Control Group**  **(n=20)** | | | **Preoperative**  **(n=24)** | | | **3 months after discharge (n=18)** | | **PD – 6 months after discharge**  **(n=16)** | |
| **Mean ± SD** | **Mean ± SD or Median (P25–P75)** | | ***p1*** | **Mean ± SD or Median (P25–P75)** | | **Mean ± SD or Median (P25–P75)** | ***p1*** | **Mean ± SD or Median (P25–P75)** | ***p3*** |
| Total Proteins (g/dL) | 6.99 ± 0.6 | 6.97 (6.7-7.32) | | 6.86 (6.74-7.24) | U = 203; p = 0.389 | | 6.79 ± 0.46 | t(36) = -1.273;  p = 0.210 | 6.77 ± 0.6 | t(34) = -1.211;  p = 0.233 |
| Albumin (g/dL) | 4.46 ± 0.29 | 4.51 (4.39-4.58) | | 3.95 ± 0.61 | t(34.2) = -3.583;  p = 0.181 | | 4.22 (3.92-4.44) | U = 136.5; p = 0.015 | 4.19 (3.85-4.45) | U = 144; p = 0.103 |
| C-Reactive Protein (mg/L) | 0.52 ± 0.32 | 0.4 (0.4-0.41) | | 6.19 (2.64-17.03) | U = 451; p = 0.000 | | 0.77 (0.4-4.23) | U = 338.; p = 0.010 | 0.40 (0.4-0.96) | U = 262.5; p = 0.509 |
| Blood Glucose (mg/dL) | 115.31 ± 68.09 | 96.15 (85.56-109.36) | | 121.54 (97.36-154.5) | U = 312; p = 0.092 | | 122.08 (84.74-140.5) | U = 291; p = 0.234 | 115.48 (88.98-122.2) | U = 262; p = 0.612 |
| Hemoglobin (g/dL) | 13.74 ± 1.82 | 13.8  (12.92-14.38) | | 12.62 ± 2.25 | t(42) = -1.79;  p = 0.081 | | 12.42 ± 1.57 | t(36) = -2.58;  p = 0.013 | 12.1 ± 2.02 | t(34) = -2.8;  p = 0.092 |
| Lymphocytes (x10³/mm³) | 1970 ± 485.69 | 1800  (1675-2425) | | 2233.33 ± 1241.55 | t(31) = 0.955;  p = 0.347 | | 2170.83 ± 1019.16 | t(34.2) = 0.856;  p = 0.398 | 2398.95 ± 1028.19 | t(34) = 1.815;  p = 0.078 |
| Serum Iron (µg/dL) | 84.1 ± 36.28 | 85.31 (64.51-103.01) | | 87.4 ± 38.18 | t(42) = 0.292;  p = 0.772 | | 95.03 ± 49.7 | t(36) = 0.818;  p = 0.418 | 89.77 ± 38 | t(34) = 0.503;  p = 0.617 |
| Ferritin (ng/mL) | 148.34 ± 144.2 | 97.75  (49.42-179.8) | | 336 (93.67-828.8) | U = 362; p = 0.004 | | 254.6 (159.27-554.3) | U = 359; p = 0.005 | 189.6 (119.4-401.5) | U = 345.000;  p = 0.014 |
| UIBC (µg/dL) | 318.29 ± 39.91 | 320.12  (298.79-339.53) | | 287.71 ± 70.77 | t(42) = -1.716;  p = 0.247 | | 296.85 (276.78-307.78) | U = 153; p = 0.144 | 298.09 ± 36.16 | t(34) = -1.76;  p = 0.237 |
| Transferrin (mg/dL) | 254.63 ± 31.93 | 256.1  (239.03-271.63) | | 230.17 ± 56.61 | t(42) = -1.711;  p = 0.241 | | 237.48 (221.42-246.22) | U = 151; p = 0.140 | 238.47 ± 28.92 | t(34) = -1.71;  p = 0.230 |
| Transferrin Saturation (%) | 26.79 ± 11.76 | 28.6 (19.72-34.5) | | 31.45 ± 14.67 | t(42) = 1.146;  p = 0.258 | | 32.07 ± 15.61 | t(36) = 1.245;  p = 0.421 | 30.29 ± 13.2 | t(34) = 0.92;  p = 0.363 |
| Urea (mg/dL) | 33.49 ± 6.99 | 34.16 (28.65-40) | | 34.72 (25.59-41.4) | U = 236; p = 0.934 | | 31.75 (23.37-38.97) | U = 209; p = 0.472 | 31.25 (21.96-40.44) | U = 202; p = 0.376 |
| Creatinine (mg/dL) | 1.06 ± 0.23 | 1.12 (0.93-1.26) | | 0.92 (0.8-1.16) | U = 189; p = 0.238 | | 0.84 (0.74-1.14) | U = 150; p = 0.126 | 0.87 (0.78-1.09) | U = 165.5; p = 0.234 |
| Aspartate Aminotransferase (AST) (U/L) | 25.21 ± 7.12 | 24.01  (18.96-28.54) | | 147.88  (81.54-267.3) | U = 431; p = 0.000 | | 29.6 (24.15-38.55) | U = 334; p = 0.027 | 27.85 (25.46-38.81) | U = 165.5; p = 0.081 |
| Alanine Aminotransferase (ALT) (U/L) | 23.99 ± 10.61 | 24.48  (15.97-29.56) | | 146.68 (71.68-253.93) | U = 455; p = 0.000 | | 29.73 (16.52-39.14) | U = 310; p = 0.101 | 34.09 (23.5-42.54) | U = 345; p = 0.014 |
| Folic Acid (ng/mL) | 18.89 ± 4.74 | 19.34  (16.79-22.66) | | 13.85 (9.91-18.99) | U = 142; p = 0.021 | | 20.67 (10.81-24) | U = 240; p = 1.000 | 21.52 (13.8-24) | U = 253; p = 0.766 |
| Vitamin B12 (pg/mL) | 497.8 ± 143.75 | 460.5  (417-566.75) | | 478 (410-688) | U = 26; p = 0.517 | | 561.5 (382.5-1047) | U = 285.5; p = 0.028 | 359.5 (313-544.5) | U = 179; p = 0.091 |
| Vitamin A (µg/dL) | 0.58 ± 0.16 | 0.55 (0.44-0.71) | | 0.30 (0.19-0.35) | | U = 28; p = 0.000 | 0.33 ± 0.11 | t(32.9) = -5.853;  p = 0.000 | 0.3 (0.26-0.38) | U = 49.5; p = 0.000 |
| Vitamin E (mg/dL) | 9.05 ± 2.73 | | 9.3 (6.53-10.58) | 7.46 (6.11-8.6) | | U = 194; p = 0.283 | 7.34 ± 2.41 | t(36) = -2.198;  p = 0.034 | 4.98 (4.88-6.13) | U = 74; p = 0.000 |
| Copper (µg/dL) | 106.83 ± 23.38 | | 109  (91.95-113.8) | 139 (105.35-152.45) | | U = 351; p = 0.009 | 103.94 ± 31.45 | t(36) = -0.34;  p = 0.736 | 95.7 ± 27.61 | t(34) = -1.426;  p = 0.161 |
| Zinc (µg/dL) | 81.92 ± 10.16 | | 83.5  (74.57-87.12) | 87.5 (58.25-96) | | U = 248; p = 0.860 | 77 (73.62-86.62) | U = 223.5;  p = 0.706 | 79.92 ± 16.36 | t(34) = -0.474;  p = 0.638 |
| UIBC: Unsaturated Iron-Binding Capacity; g/dL: grams per deciliter; mg/dL: milligrams per deciliter; mg/L: milligrams per liter; µg/dL: micrograms per deciliter; ng/mL: nanograms per milliliter; pg/mL: picograms per milliliter; x10³/mm³: thousand cells per cubic millimeter; U/L: units per liter; %: percentage. Data are expressed as mean ± SD or median (P25–P75%), according to the statistical distribution observed in each comparison. P-values refer to the statistical models applied for comparisons between time points: p¹ = pre-operative vs. 3 months; p² = 3 months vs. 6 months; p³ = pre-operative vs. 6 months. Mixed-effect linear models (t-test, with degrees of freedom estimated by Satterthwaite's method) were used for variables with an approximately normal distribution, and generalized linear models (z-statistic) for variables with a non-normal distribution, according to the suitability of each variable. The Holm-Bonferroni method was used for the correction of multiple comparisons. P-values ≤ 0.05 were considered statistically significant.. | | | | | | | | | | |

| **Table 6.** Linear regression analysis between nutrient intake and serum biomarkers adjusted for CRP (mg/L) and Ferritin (ng/mL) in the PD Group. | | | | | | | | |
| --- | --- | --- | --- | --- | --- | --- | --- | --- |
|  |  |  | Preoperative  (n = 24) | | 3 months after discharge  (n = 18) | | 1. months after discharge 2. (n = 16) | |
| **Intake variable** | Corresponding biomarker | Adjustment | ***p*** | **Significance** | ***p*** | **Significance** | ***p*** | **Significance** |
| Proteins (g) | Albumin (g/dL) | CRP | t(67) = 0.925,  p = 0.358 | Not significant | t(67) = 0.925,  p = 0.358 | Not significant | t(67) = 0.925,  p = 0.358 | Not significant |
| Total proteins (g/dL) | CRP | t(67) = 0.795,  p = 0.43 | Not significant | t(67) = 0.795,  p = 0.43 | Not significant | t(67) = 0.795,  p = 0.43 | Not significant |
| Iron (mg) | Serum iron (µg/dL) | CRP | t(67) = 1.53,  p = 0.131 | Not significant | t(67) = 1.53,  p = 0.131 | Not significant | t(67) = 1.53,  p = 0.131 | Not significant |
| Ferritin (ng/mL) | CRP | t(67) = 1.966,  p = 0.053 | Trend, marginal | t(67) = 1.966,  p = 0.053 | Trend, marginal | t(67) = 1.966,  p = 0.053 | Trend, marginal |
| Hemoglobin (g/dL) | CRP | t(67) = 2.226,  p = 0.029 | Significant | t(67) = 2.226,  p = 0.029 | Significant | t(67) = 2.226,  p = 0.029 | Significant |
| Zinc (mg) | Serum zinc (µg/dL) | CRP | t(67) = 0.689,  p = 0.493 | Not significant | t(67) = 0.689,  p = 0.493 | Not significant | t(67) = 0.689,  p = 0.493 | Not significant |
| Vitamin A (mg) | |  | | --- |   Vitamin A (µg/dL)   |  | | --- | | CRP | t(67) = -0.32,  p = 0.75 | Not significant | t(67) = -0.32,  p = 0.75 | Not significant | t(67) = -0.32,  p = 0.75 | Not significant |
| Vitamin E (mg) | Vitamin E (mg/dL) | CRP | t(67) = 1.588,  p = 0.117 | Not significant | t(67) = 1.588,  p = 0.117 | Not significant | t(67) = 1.588,  p = 0.117 | Not significant |
|  |  |  |  |  |  |  |  |  |
| Proteins (g) | Albumin (g/dL) | Ferritin | t(67) = 0.338,  p = 0.736 | Not significant | t(67) = 0.338,  p = 0.736 | Not significant | t(67) = 0.338, p = 0.736 | Not significant |
| Total proteins (g/dL) | Ferritin | t(67) = 1.153,  p = 0.253 | Not significant | t(67) = 1.153,  p = 0.253 | Not significant | t(67) = 1.153, p = 0.253 | Not significant |
| Iron (mg) | Serum iron (µg/dL) | Ferritin | t(67) = 1.42,  p = 0.16 | Not significant | t(67) = 1.42,  p = 0.16 | Not significant | t(67) = 1.42,  p = 0.16 | Not significant |
| Ferritin (ng/mL) | Ferritin | t(68) = 2.116,  p = 0.038 | Significant | t(68) = 2.116,  p = 0.038 | Significant | t(68) = 2.116, p = 0.038 | Significant |
| Hemoglobin (g/dL) | Ferritin | t(67) = 2.027,  p = 0.047 | Significant | t(67) = 2.027,  p = 0.047 | Significant | t(67) = 2.027, p = 0.047 | Significant |
| Zinc (mg) | Serum zinc (µg/dL) | Ferritin | t(67) = 0.087,  p = 0.931 | Not significant | t(67) = 0.087,  p = 0.931 | Not significant | t(67) = 0.087, p = 0.931 | Not significant |
| Vitamin A (mg) | |  | | --- |   Vitamin A (µg/dL)   |  | | --- | | Ferritin | t(67) = -0.245,  p = 0.807 | Not significant | t(67) = -0.245,  p = 0.807 | Not significant | t(67) = -0.245,  p = 0.807 | Not significant |
| Vitamin E (mg) | Vitamin E (mg/dL) | Ferritin | t(67) = 1.593,  p = 0.116 | Not significant | t(67) = 1.593,  p = 0.116 | Not significant | t(67) = 1.593, p = 0.116 | Not significant |
| g = gram; mg = milligram; µg = microgram; ng = nanogram; mL = milliliter; dL = deciliter. Linear regression models were adjusted for C-reactive protein (CRP), ferritin, age, and sex. p values refer to the regression coefficient of the corresponding intake variable. * Statistically significant values (p ≤ 0.05). Results were consistent across the three time points evaluated (preoperative, and 3 and 6 months after discharge). | | | | | | | | |

| **Table 6.** Linear regression analysis between nutrient intake and serum biomarkers adjusted for CRP (mg/L) and Ferritin (ng/mL) in the PD Group. | | | | | | | | |
| --- | --- | --- | --- | --- | --- | --- | --- | --- |
|  |  |  | Preoperative  (n = 24) | | 3 months after discharge  (n = 18) | | 1. months after discharge 2. (n = 16) | |
| **Intake variable** | **Corresponding biomarker** | **Adjustment** | ***p*** | **Significance** | ***p*** | **Significance** | ***p*** | **Significance** |
| Proteins (g) | Albumin (g/dL) | CRP | t(67) = 0.925,  p = 0.358 | Not significant | t(67) = 0.925,  p = 0.358 | Not significant | t(67) = 0.925,  p = 0.358 | Not significant |
| Total proteins (g/dL) | CRP | t(67) = 0.795,  p = 0.43 | Not significant | t(67) = 0.795,  p = 0.43 | Not significant | t(67) = 0.795,  p = 0.43 | Not significant |
| Iron (mg) | Serum iron (µg/dL) | CRP | t(67) = 1.53,  p = 0.131 | Not significant | t(67) = 1.53,  p = 0.131 | Not significant | t(67) = 1.53,  p = 0.131 | Not significant |
| Ferritin (ng/mL) | CRP | t(67) = 1.966,  p = 0.053 | Trend, marginal | t(67) = 1.966,  p = 0.053 | Trend, marginal | t(67) = 1.966,  p = 0.053 | Trend, marginal |
| Hemoglobin (g/dL) | CRP | t(67) = 2.226,  p = 0.029 | Significant | t(67) = 2.226,  p = 0.029 | Significant | t(67) = 2.226,  p = 0.029 | Significant |
| Zinc (mg) | Serum zinc (µg/dL) | CRP | t(67) = 0.689,  p = 0.493 | Not significant | t(67) = 0.689,  p = 0.493 | Not significant | t(67) = 0.689,  p = 0.493 | Not significant |
| Vitamin A (mg) | |  | | --- |   Vitamin A (µg/dL)   |  | | --- | | CRP | t(67) = -0.32,  p = 0.75 | Not significant | t(67) = -0.32,  p = 0.75 | Not significant | t(67) = -0.32,  p = 0.75 | Not significant |
| Vitamin E (mg) | Vitamin E (mg/dL) | CRP | t(67) = 1.588,  p = 0.117 | Not significant | t(67) = 1.588,  p = 0.117 | Not significant | t(67) = 1.588,  p = 0.117 | Not significant |
|  |  |  |  |  |  |  |  |  |
| Proteins (g) | Albumin (g/dL) | Ferritin | t(67) = 0.338,  p = 0.736 | Not significant | t(67) = 0.338,  p = 0.736 | Not significant | t(67) = 0.338, p = 0.736 | Not significant |
| Total proteins (g/dL) | Ferritin | t(67) = 1.153,  p = 0.253 | Not significant | t(67) = 1.153,  p = 0.253 | Not significant | t(67) = 1.153, p = 0.253 | Not significant |
| Iron (mg) | Serum iron (µg/dL) | Ferritin | t(67) = 1.42,  p = 0.16 | Not significant | t(67) = 1.42,  p = 0.16 | Not significant | t(67) = 1.42,  p = 0.16 | Not significant |
| Ferritin (ng/mL) | Ferritin | t(68) = 2.116,  p = 0.038 | Significant | t(68) = 2.116,  p = 0.038 | Significant | t(68) = 2.116, p = 0.038 | Significant |
| Hemoglobin (g/dL) | Ferritin | t(67) = 2.027,  p = 0.047 | Significant | t(67) = 2.027,  p = 0.047 | Significant | t(67) = 2.027, p = 0.047 | Significant |
| Zinc (mg) | Serum zinc (µg/dL) | Ferritin | t(67) = 0.087,  p = 0.931 | Not significant | t(67) = 0.087,  p = 0.931 | Not significant | t(67) = 0.087, p = 0.931 | Not significant |
| Vitamin A (mg) | |  | | --- |   Vitamin A (µg/dL)   |  | | --- | | Ferritin | t(67) = -0.245,  p = 0.807 | Not significant | t(67) = -0.245,  p = 0.807 | Not significant | t(67) = -0.245,  p = 0.807 | Not significant |
| Vitamin E (mg) | Vitamin E (mg/dL) | Ferritin | t(67) = 1.593,  p = 0.116 | Not significant | t(67) = 1.593,  p = 0.116 | Not significant | t(67) = 1.593, p = 0.116 | Not significant |
| g = gram; mg = milligram; µg = microgram; ng = nanogram; mL = milliliter; dL = deciliter. Linear regression models were adjusted for C-reactive protein (CRP), ferritin, age, and sex. p values refer to the regression coefficient of the corresponding intake variable. * Statistically significant values (p ≤ 0.05). Results were consistent across the three time points evaluated (preoperative, and 3 and 6 months after discharge). | | | | | | | | |

| **Table 7.** Linear regression analysis between nutrient intake and serum biomarkers adjusted for CRP (mg/L) and Ferritin (ng/mL) in the Controle Group. | | | | |
| --- | --- | --- | --- | --- |
|  |  |  | **Control Group (n=20)** | |
| **Intake variable** | **Corresponding biomarker** | **Adjustment** | ***p*** | **Significance** |
| Proteins (g) | Albumin (g/dL) | CRP | t(15) = -0.63,  p = 0.538 | Not significant |
| Total proteins (g/dL) | CRP | t(15) = 1.713,  p = 0.107 | Not significant |
| Iron (mg) | Serum iron (µg/dL) | CRP | t(15) = -0.738,  p = 0.472 | Not significant |
| Ferritin (ng/mL) | CRP | t(15) = -0.728,  p = 0.478 | Not significant |
| Hemoglobin (g/dL) | CRP | t(15) = 0.813,  p = 0.429 | Not significant |
| Zinc (mg) | Serum zinc (µg/dL) | CRP | t(15) = -0.666,  p = 0.515 | Not significant |
| Vitamin A (mg) | |  | | --- |   Vitamin A (µg/dL)   |  | | --- | | CRP | t(15) = -0.55,  p = 0.59 | Not significant |
| Vitamin E (mg) | Vitamin E (mg/dL) | CRP | t(15) = -1.766,  p = 0.098 | Trend, marginal |
|  |  |  |  |  |
| Proteins (g) | Albumin (g/dL) | Ferritin | t(15) = -0.85,  p = 0.409 | Não significativa |
| Total proteins (g/dL) | Ferritin | t(15) = 1.869,  p = 0.081 | Trend, marginal |
| Iron (mg) | Serum iron (µg/dL) | Ferritin | t(15) = -0.587,  p = 0.566 | Not significant |
| Ferritin (ng/mL) | Ferritin | t(16) = -0.76,  p = 0.458 | Not significant |
| Hemoglobin (g/dL) | Ferritin | t(15) = 1.15,  p = 0.268 | Not significant |
| Zinc (mg) | Serum zinc (µg/dL) | Ferritin | t(15) = -0.778,  p = 0.448 | Not significant |
| Vitamin A (mg) | |  | | --- |   Vitamin A (µg/dL)   |  | | --- | | Ferritin | t(15) = -0.448,  p = 0.661 | Not significant |
| Vitamin E (mg) | Vitamin E (mg/dL) | Ferritin | t(15) = -2.342,  p = 0.033 | Significant |
| g = gram; mg = milligram; µg = microgram; ng = nanogram; mL = milliliter; dL = deciliter. Linear regression models were adjusted for C-reactive protein (CRP), ferritin, age, and sex. p values refer to the regression coefficient of the corresponding intake variable. * Statistically significant values (p ≤ 0.05). Results were consistent across the three time points evaluated (preoperative, and 3 and 6 months after discharge). | | | | |
